# Supplementary material for: A New 9,10-Dihydrophenanthrene and Cell Proliferative 3,4-δ-Dehydrotocopherols from Stemona tuberosa
Source: PubMed Central journal article supplement (PMC6272770; doi:10.3390/molecules20045965), 2015-04-03
Supplement: molecules-20-05965-s001.pdf [file molecules-20-05965-s001.pdf]

# Supplementary Materials

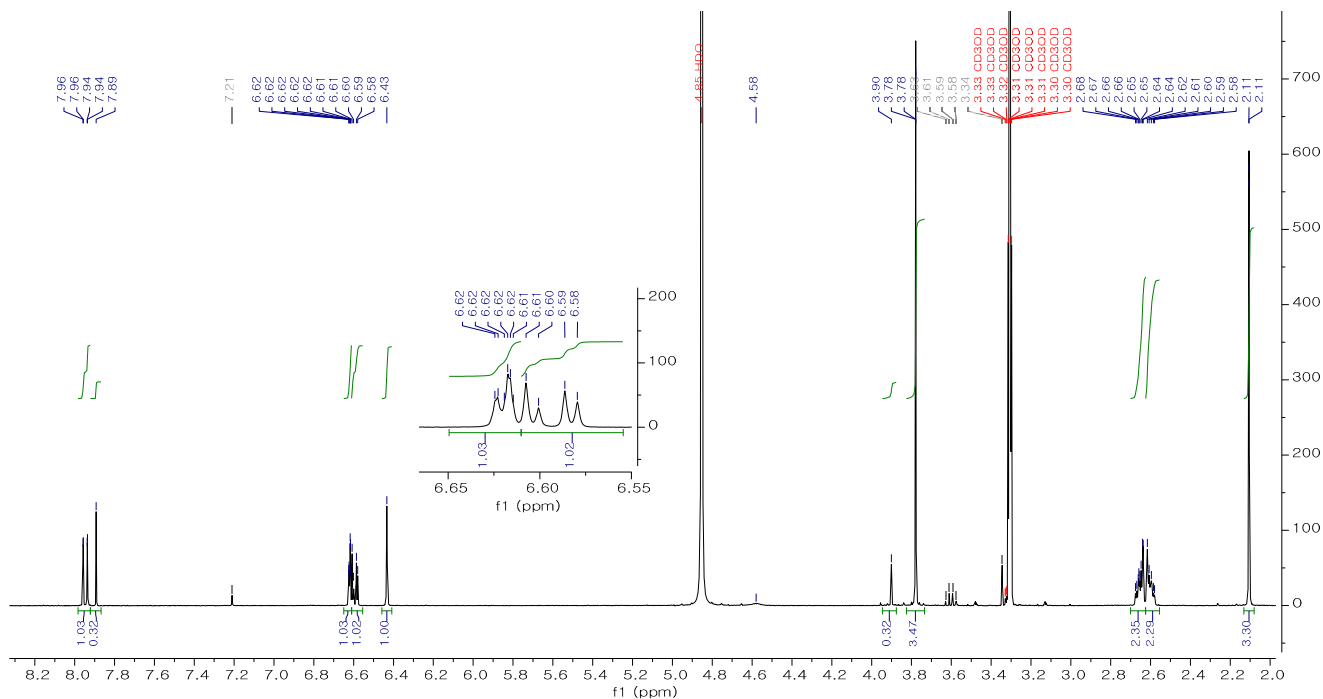

Figure S1.  $^1\text{H}$ -NMR spectrum (400 MHz,  $\text{CD}_3\text{OD}$ ) of **1**.

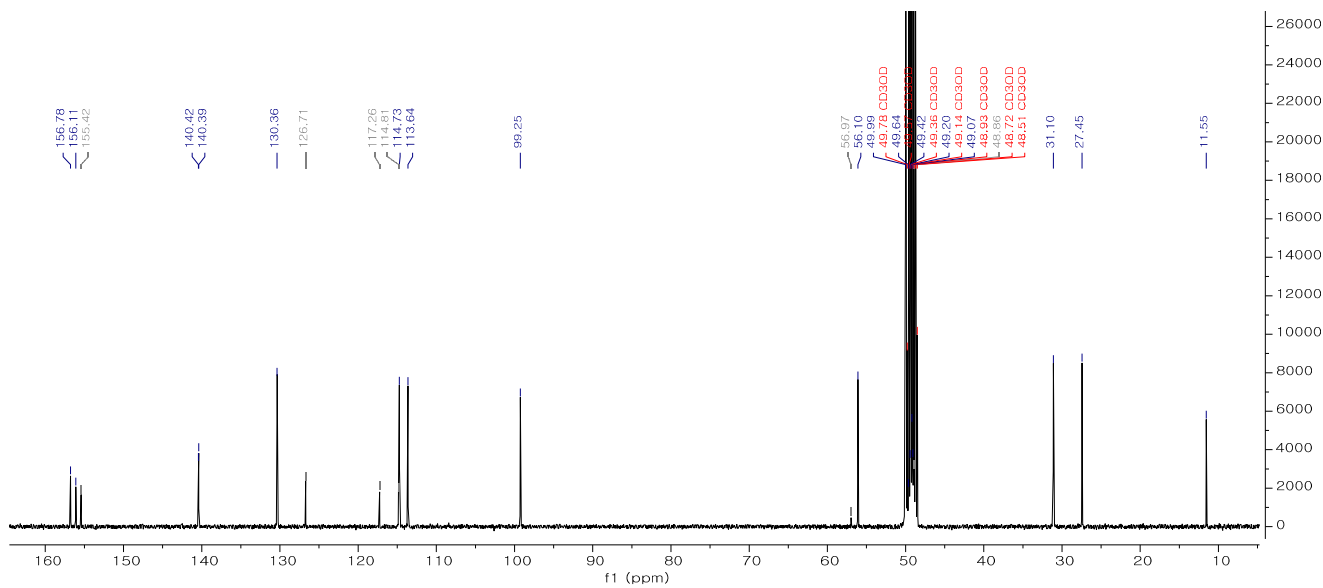

Figure S2.  $^{13}\text{C}$ -NMR spectrum (100 MHz,  $\text{CD}_3\text{OD}$ ) of **1**.

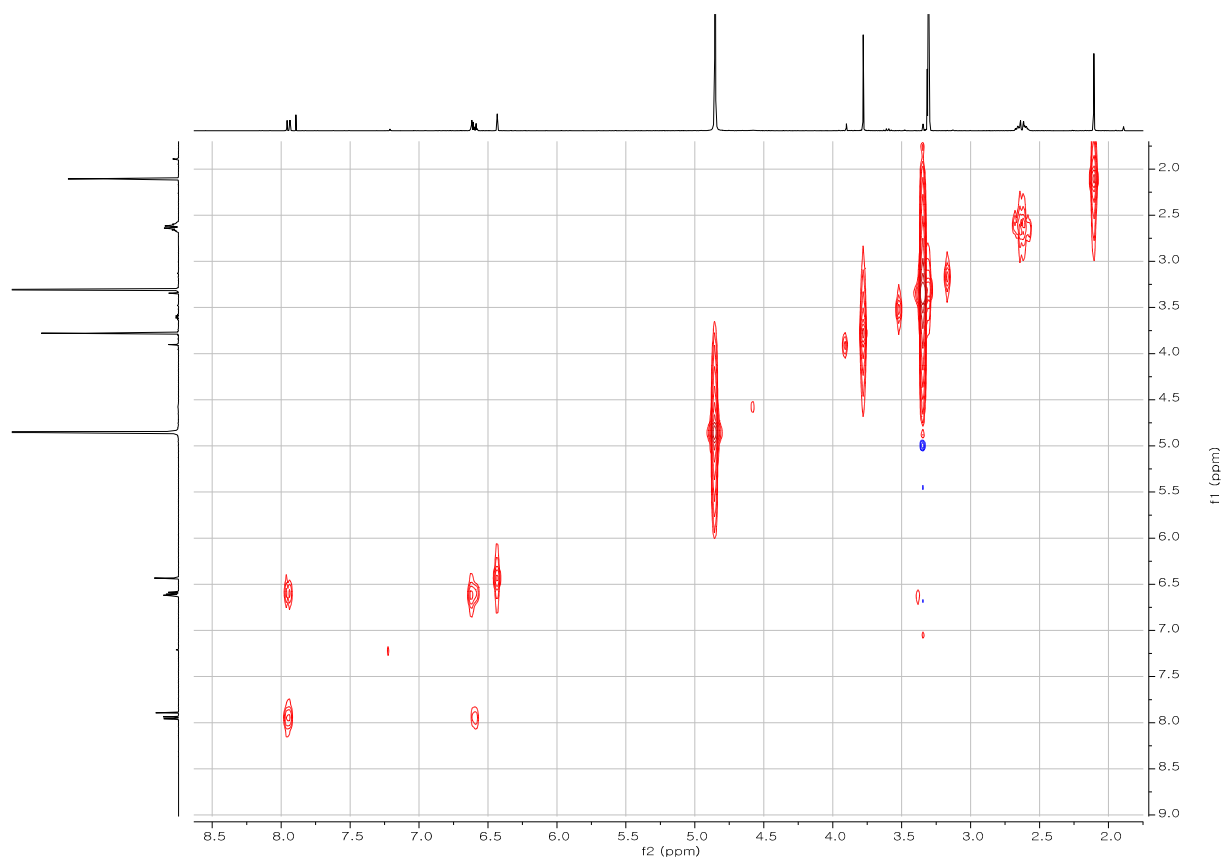

**Figure S3.** <sup>1</sup>H-<sup>1</sup>H COSY NMR spectrum (CD<sub>3</sub>OD) of **1**.

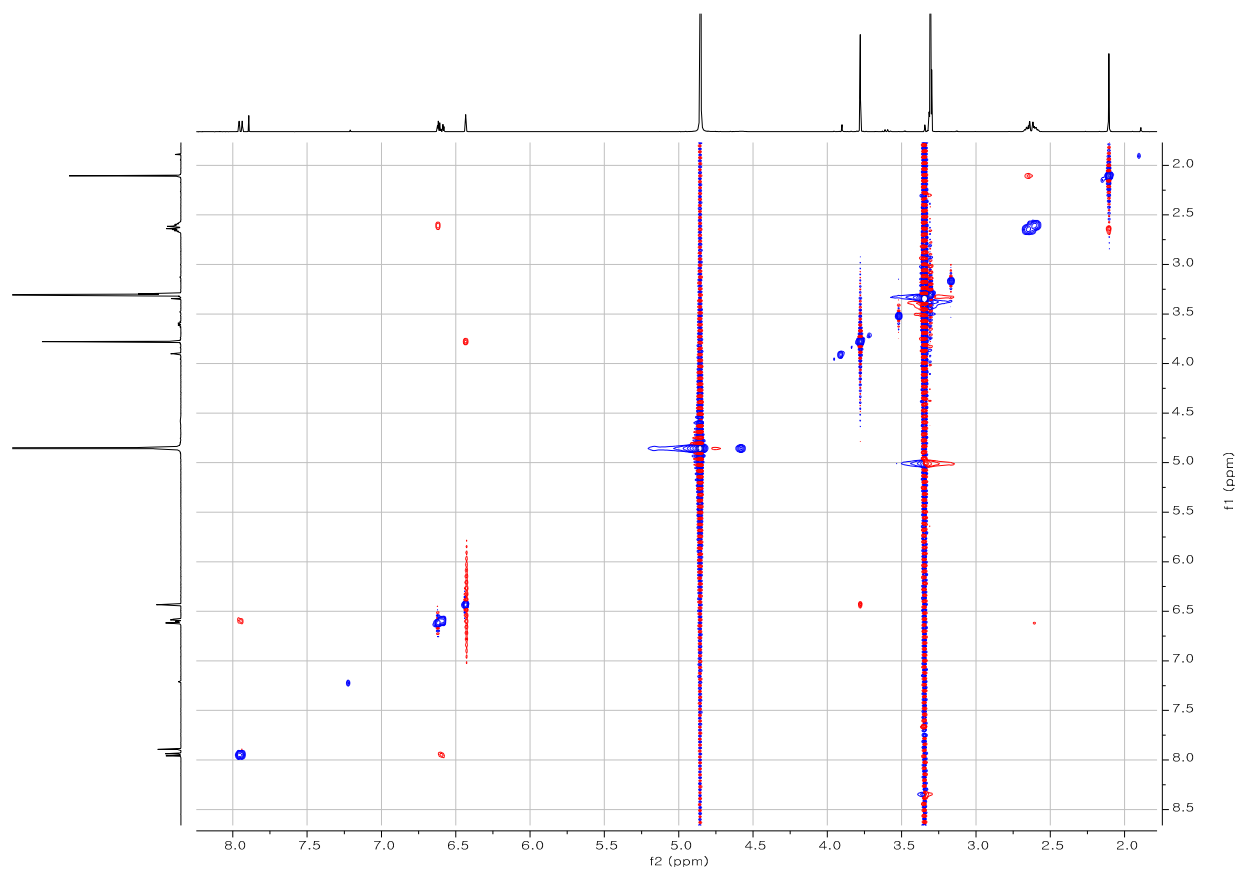

**Figure S4.** <sup>1</sup>H-<sup>1</sup>H NOESY NMR spectrum (CD<sub>3</sub>OD) of **1**.

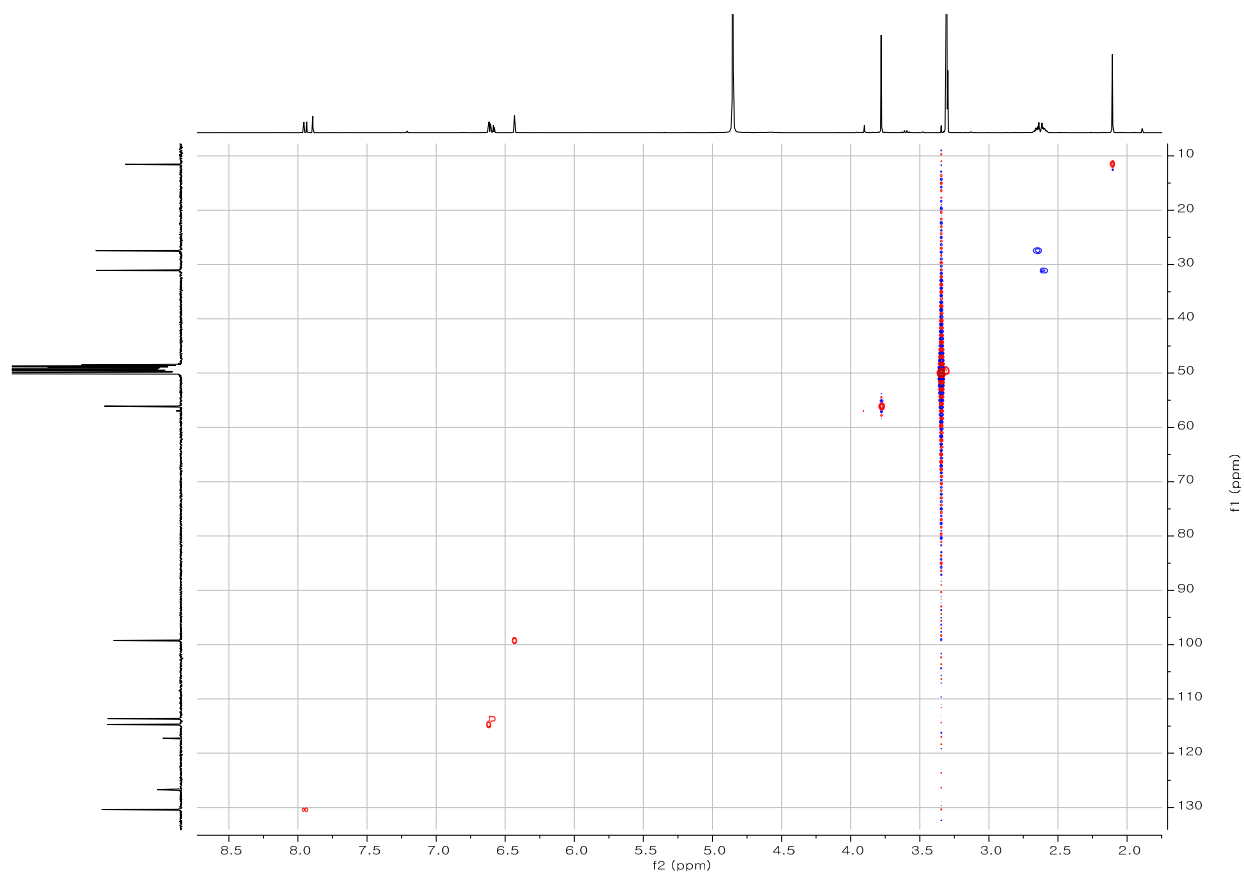

**Figure S5.**  $^1\text{H}$ - $^{13}\text{C}$  HSQC NMR spectrum ( $\text{CD}_3\text{OD}$ ) of **1**.

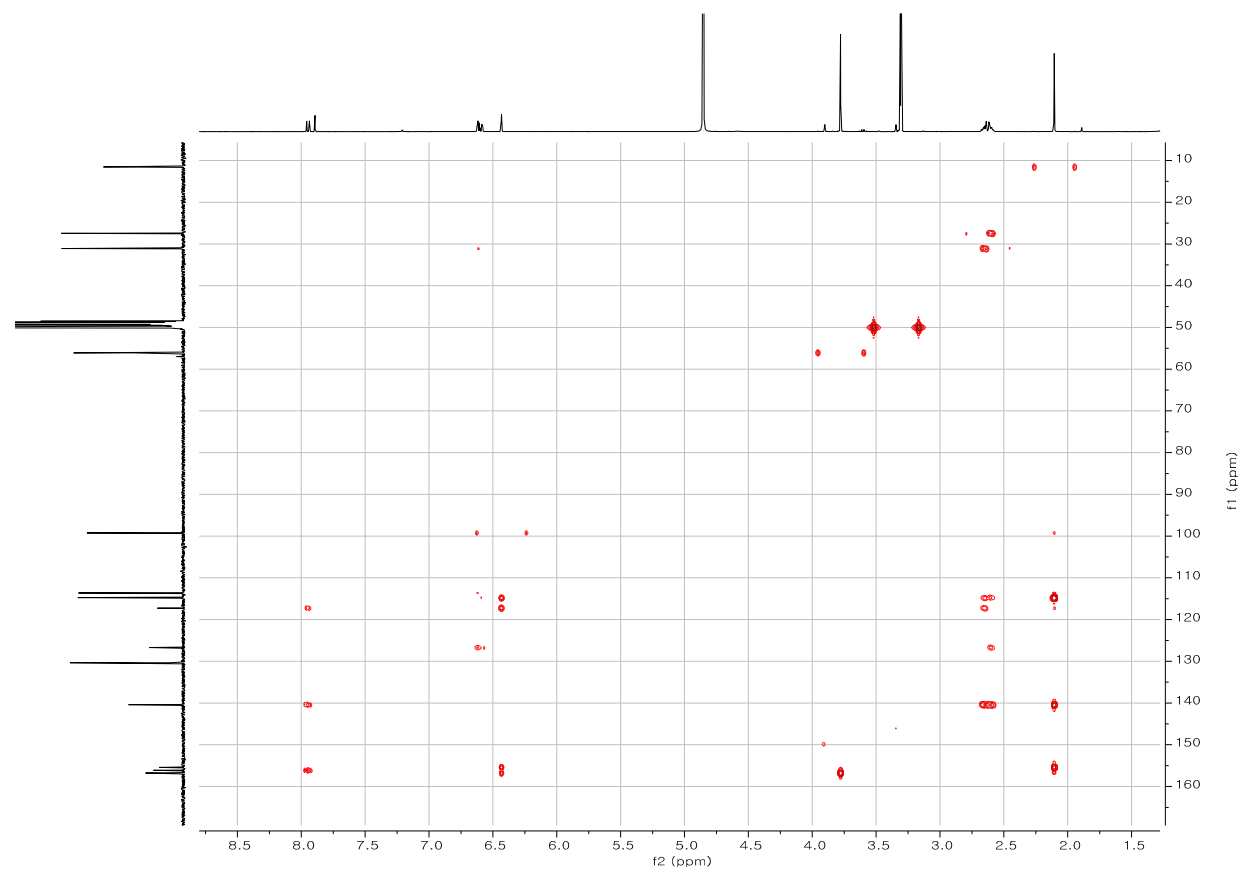

**Figure S6.**  $^1\text{H}$ - $^{13}\text{C}$  HMBC NMR spectrum ( $\text{CD}_3\text{OD}$ ) of **1**.

# Qualitative Compound Report

|                        |              |               |                       |
|------------------------|--------------|---------------|-----------------------|
| Data File              | 4(p)02.d     | Sample Name   | SampleName            |
| Sample Type            | Sample       | Position      | P1-E1                 |
| Instrument Name        | Instrument 1 | User Name     |                       |
| Acq Method             |              | Acquired Time | 10/5/2012 11:22:42 AM |
| IRM Calibration Status | Success      | DA Method     | kikisil.m             |
| Comment                | vol. 0.01    |               |                       |

**Compound Table**

| Compound Label  | RT    | Mass     | Abund | Formula  | Tgt Mass | Diff (ppm) |
|-----------------|-------|----------|-------|----------|----------|------------|
| Cpd 1: C16H16O3 | 0.123 | 256.1099 | 4703  | C16H16O3 | 256.1099 | 0.01       |

| Compound Label  | RT    | Algorithm       | Mass     |
|-----------------|-------|-----------------|----------|
| Cpd 1: C16H16O3 | 0.123 | Find By Formula | 256.1099 |

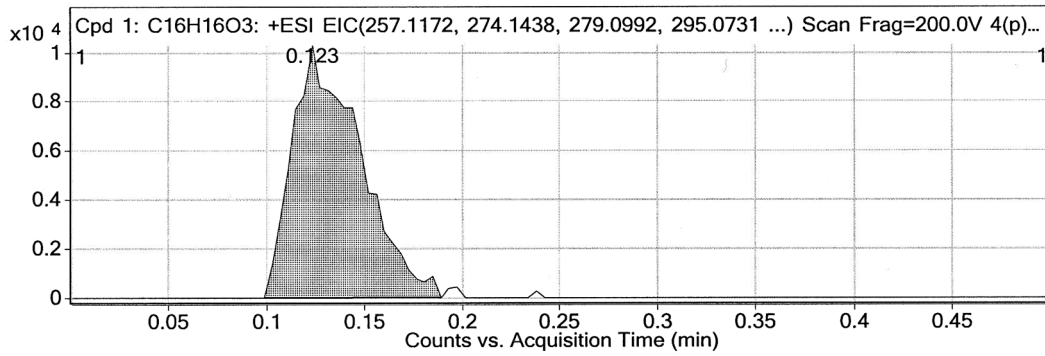

**MS Spectrum**

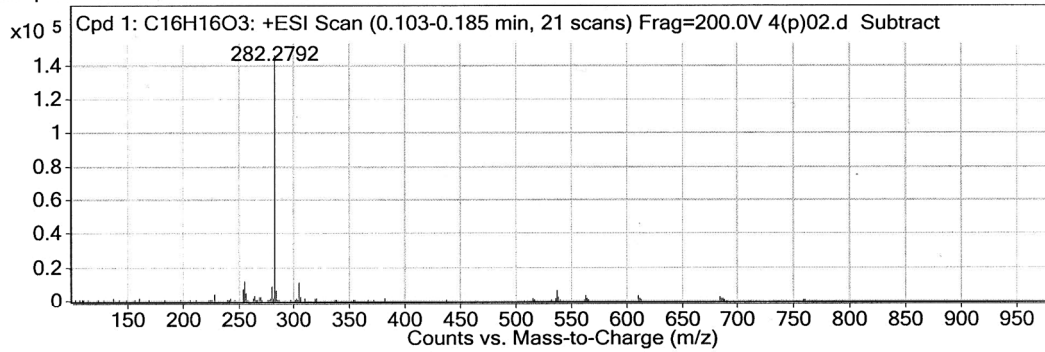

**MS Zoomed Spectrum**

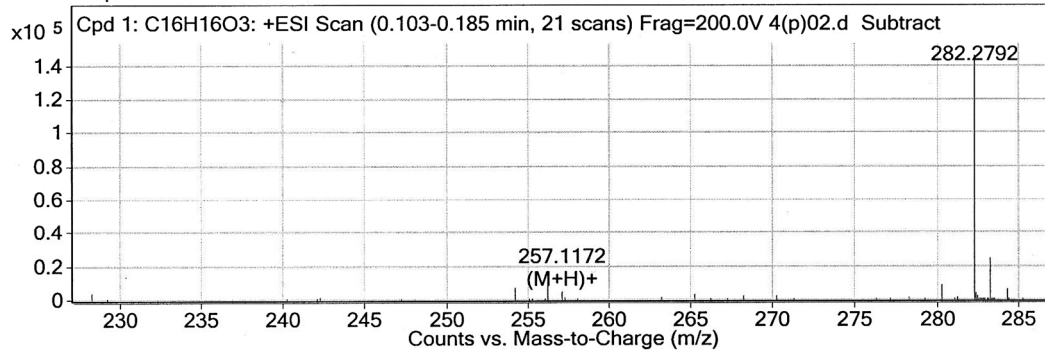

**MS Spectrum Peak List**

| m/z      | Calc m/z | Diff (ppm) | z | Abund | Formula    | Ion    |
|----------|----------|------------|---|-------|------------|--------|
| 257.1172 | 257.1172 | -0.02      | 1 | 4703  | C16 H17 O3 | (M+H)+ |

**Figure S7. HRESIMS spectrum of 1.**
